# Supplementary material for: Metal-metalloid bond containing complexes of the bulky organotellurium ligand: applications in catalysis of C–O coupling and aldehyde to amide transformation reactions
Source: Royal Society of Chemistry journal article supplement (doi:10.1039/d2nj04408k), 2023-01-01
Supplement: d2nj04408k1.pdf [file d2nj04408k1.pdf]

Electronic Supplementary Information (ESI)

for

**Metal-metalloid bond containing complexes of bulky organotellurium ligand with palladium and ruthenium: applications in catalysis of C–O coupling and aldehyde to amide transformation reactions**

Preeti Oswal,<sup>a</sup> Aayushi Arora,<sup>a</sup> Suraj Purohit,<sup>a</sup> Anurag Bahuguna,<sup>a</sup> Pankaj Sharma,<sup>b</sup> Jiben Roy,<sup>c</sup> and Arun Kumar<sup>a\*</sup>

<sup>a</sup>*Department of Chemistry, School of Physical Sciences, Doon University, Dehradun, India.*

*Corresponding author: Arun Kumar, e-mail: [arunkaushik@gmail.com](mailto:arunkaushik@gmail.com), [akumar.ch@doonuniversity.ac.in](mailto:akumar.ch@doonuniversity.ac.in)*

<sup>b</sup>*Instituto de Quimica, National Autonomous University of Mexico, CDMX 04510 Mexico.*

<sup>c</sup>*Department of Sciences and Mathematics, Mississippi University for Womens, 1100 College Street, Columbus, MS 39701.*

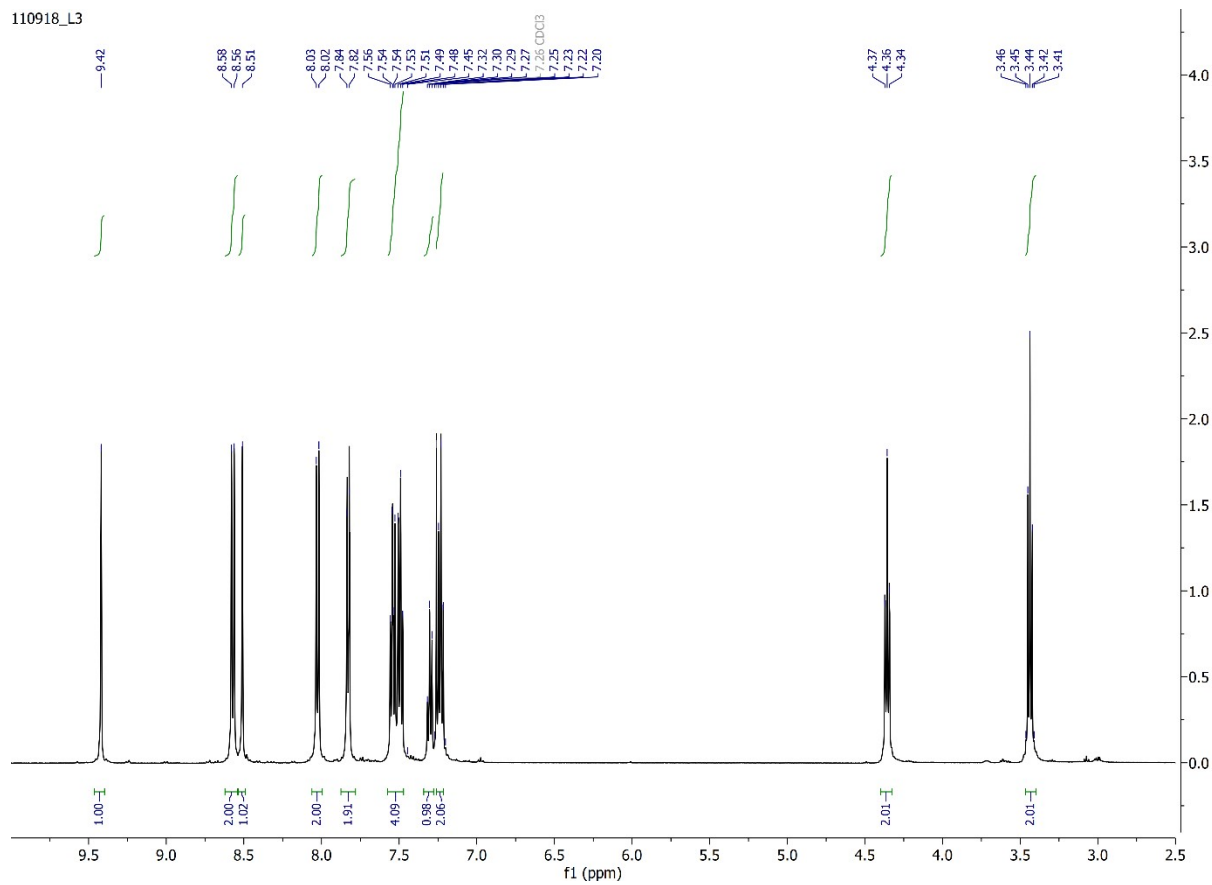

**Fig. S1.** <sup>1</sup>H NMR Spectrum of L1 recorded in CDCl<sub>3</sub>

190421\_AST

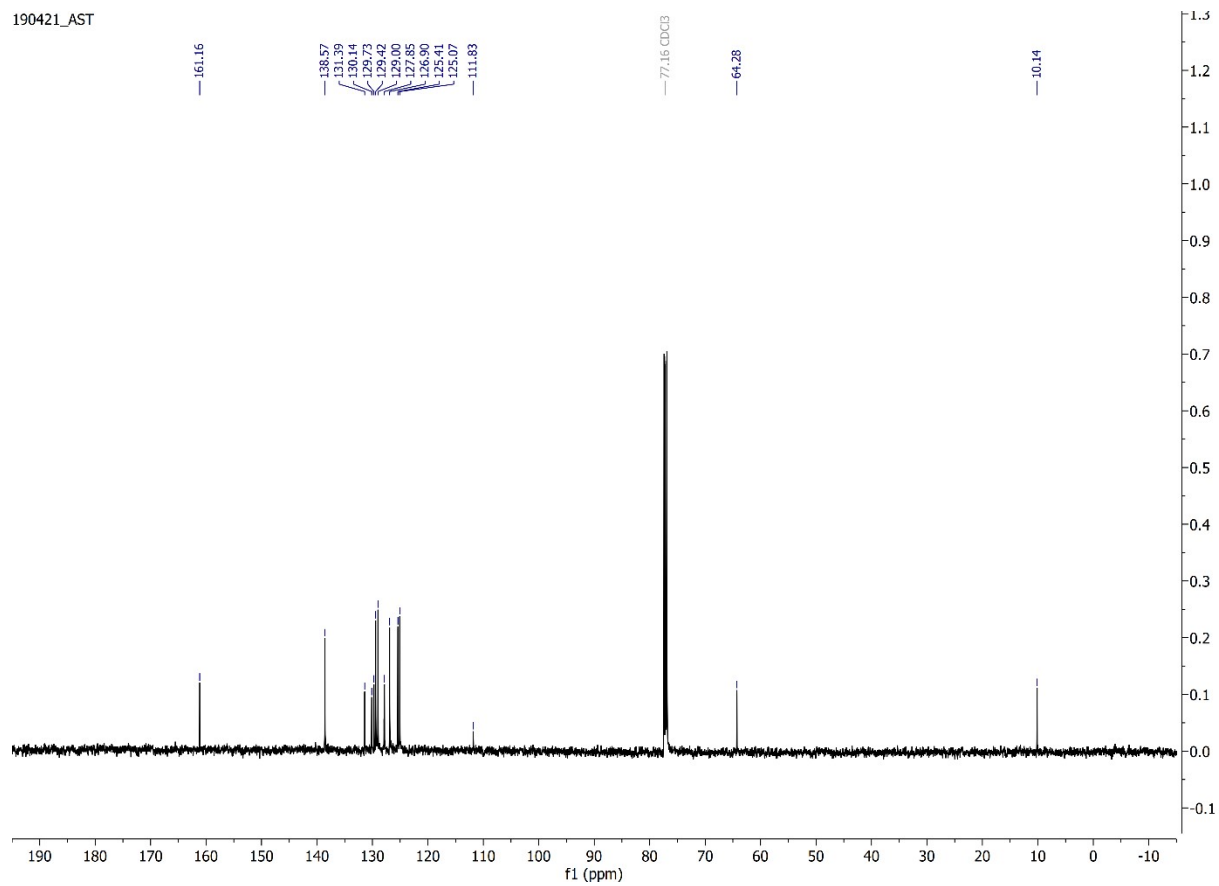

**Fig. S2.**  $^{13}\text{C}\{^1\text{H}\}$  NMR Spectrum of L1 recorded in  $\text{CDCl}_3$

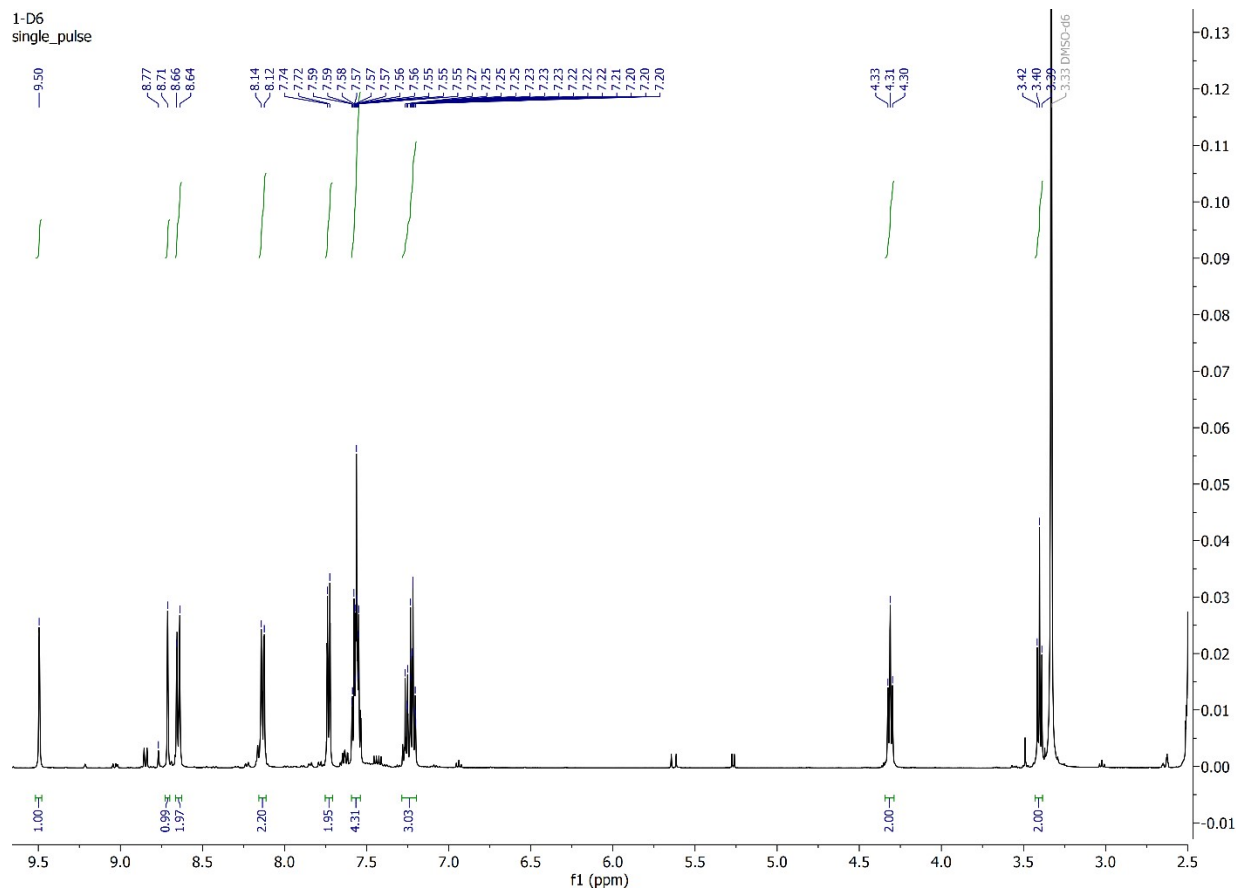

**Fig. S3.**  $^1\text{H}$  NMR Spectrum of **L1** in  $\text{DMSO-d}_6$  after keeping it at room temperature for 12 h in  $\text{DMSO-d}_6$

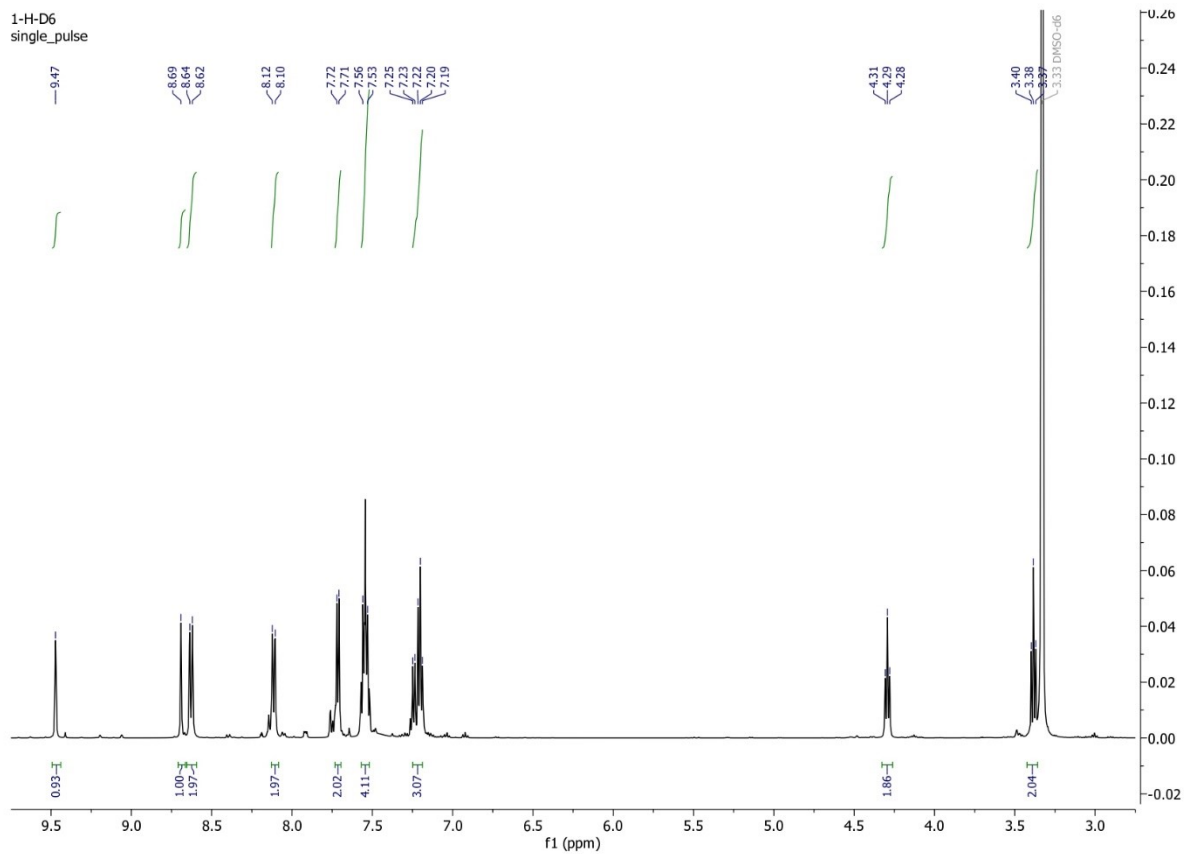

**Fig. S4.**  $^1\text{H}$  NMR Spectrum of **L1** in  $\text{DMSO-d}_6$  after keeping it at  $110\text{ }^\circ\text{C}$  for 12 h in  $\text{DMSO-d}_6$

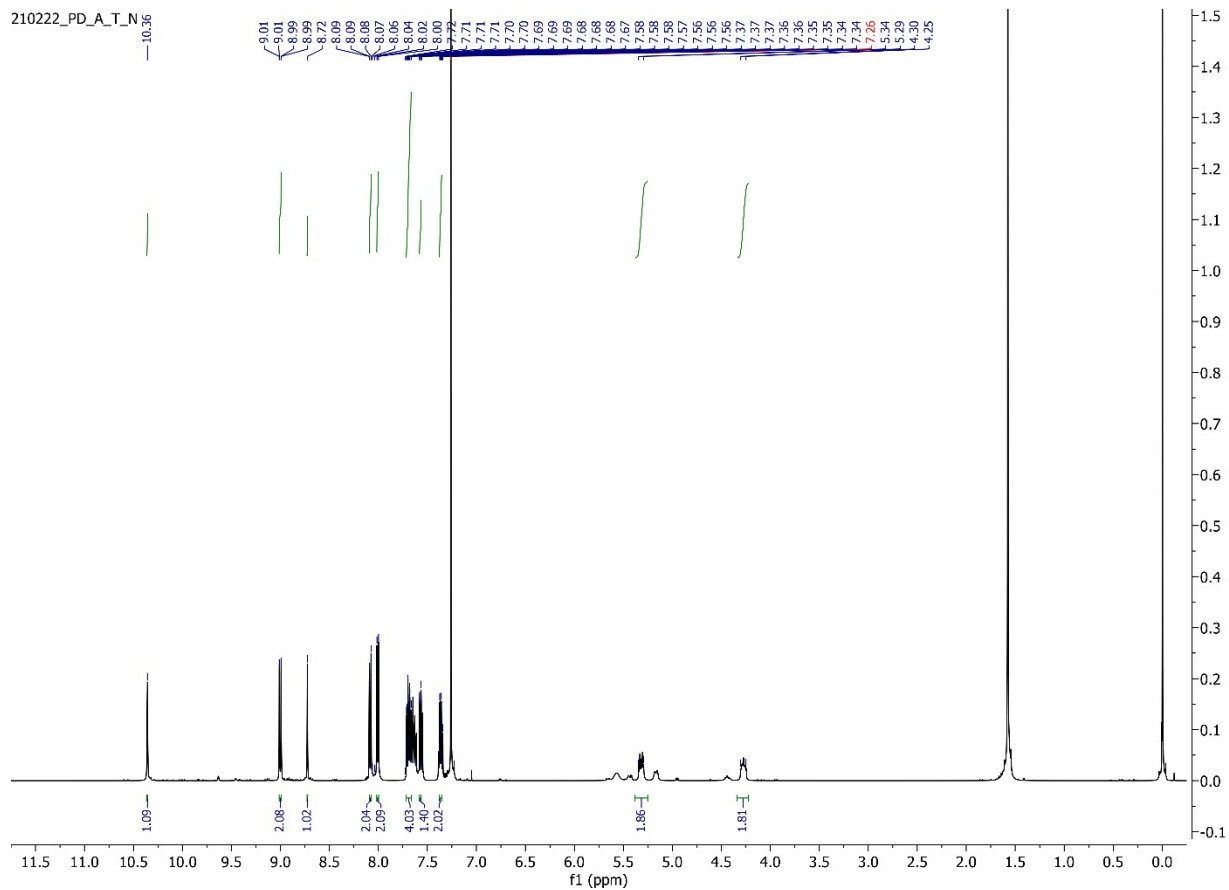

**Fig. S5.**  $^1\text{H}$  NMR of Pd(II) complex **1** recorded in  $\text{CDCl}_3$

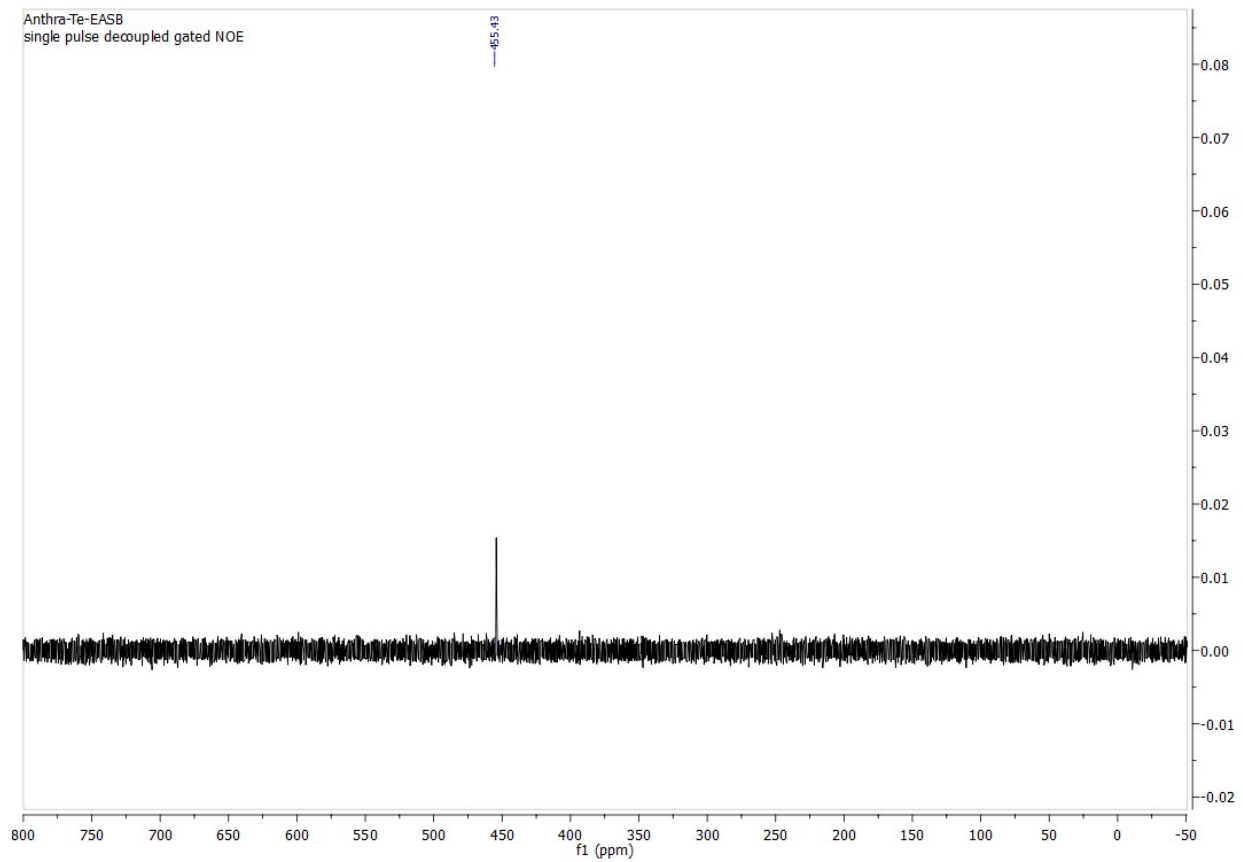

**Fig. S6.**  $^{125}\text{Te}\{^1\text{H}\}$  NMR Spectrum of **L1** recorded in  $\text{CDCl}_3$

Pd Complex  
single pulse decoupled gated NOE

670.8746

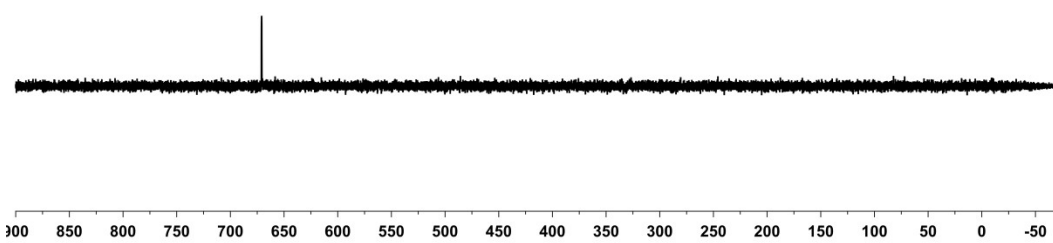

**Fig. S7.**  $^{125}\text{Te}\{^1\text{H}\}$  NMR Spectrum of palladium(II) complex **1** recorded in  $\text{DMSO-d}^6$



Ru Complex  
single pulse decoupled gated NOE

703.3235

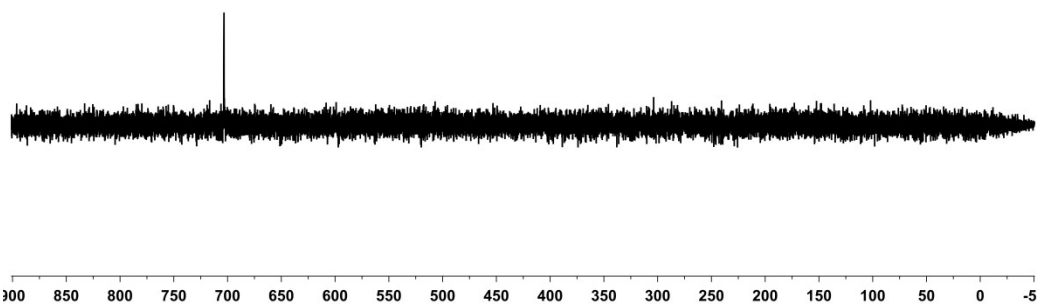

**Fig. S8.**  $^{125}\text{Te}\{^1\text{H}\}$  NMR spectrum of ruthenium(II) complex **2** recorded in  $\text{DMSO-d}^6$

2-H-D6

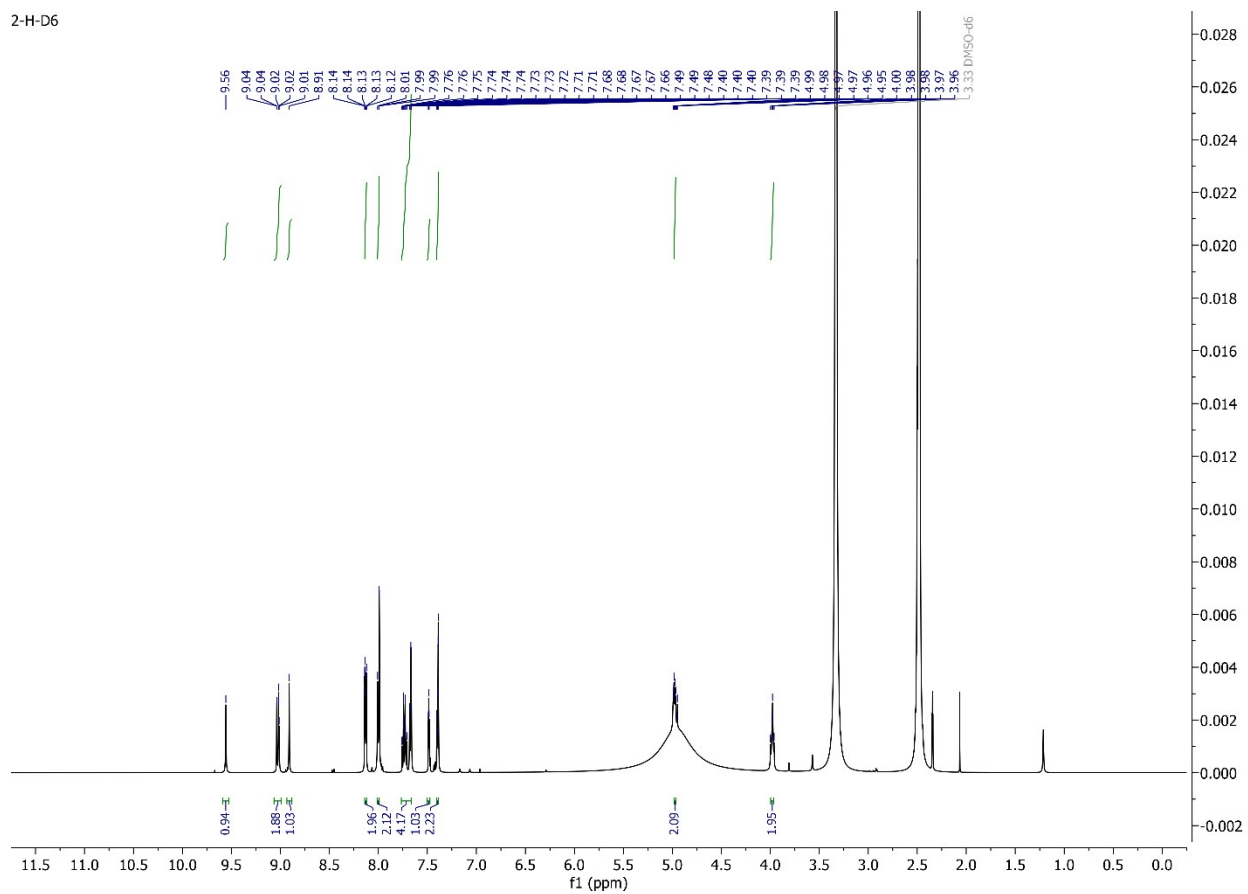

**Fig. S9.** <sup>1</sup>H NMR Spectrum of complex **1** in DMSO-d<sub>6</sub> after keeping it at room temperature for 12 hours in DMSO-d<sub>6</sub>

3-H-D6

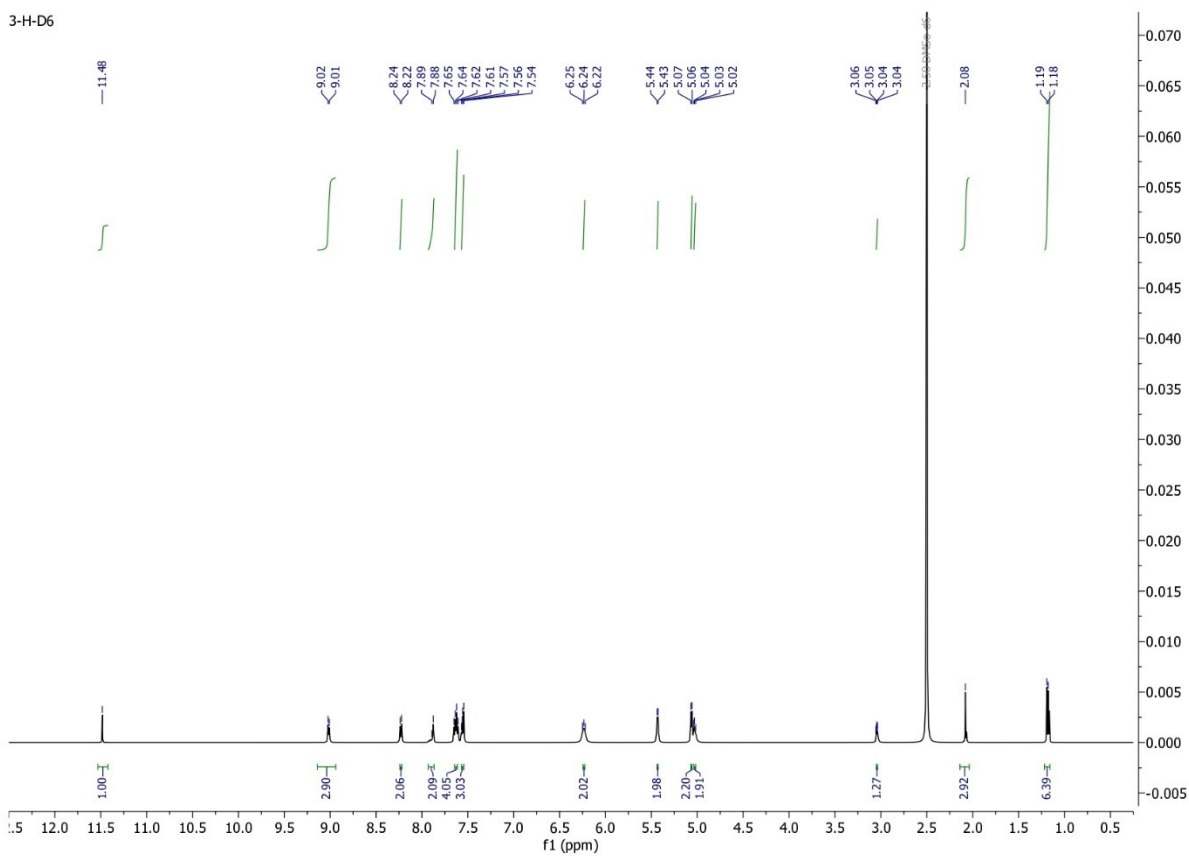

**Fig. S10.**  $^1\text{H}$  NMR Spectrum of complex **2** in  $\text{DMSO-d}_6$  after keeping it at room temperature for 12 hours in  $\text{DMSO-d}_6$

## Generic Display Report

### Analysis Info

Analysis Name D:\Data\User Data\External Samples\Shwetha2\J1.d  
Method Tune\_pos\_Mid.m  
Sample Name MEOH  
Comment

Acquisition Date 2/5/2021 1:51:59 PM

Operator HRMS  
Instrument maXis impact

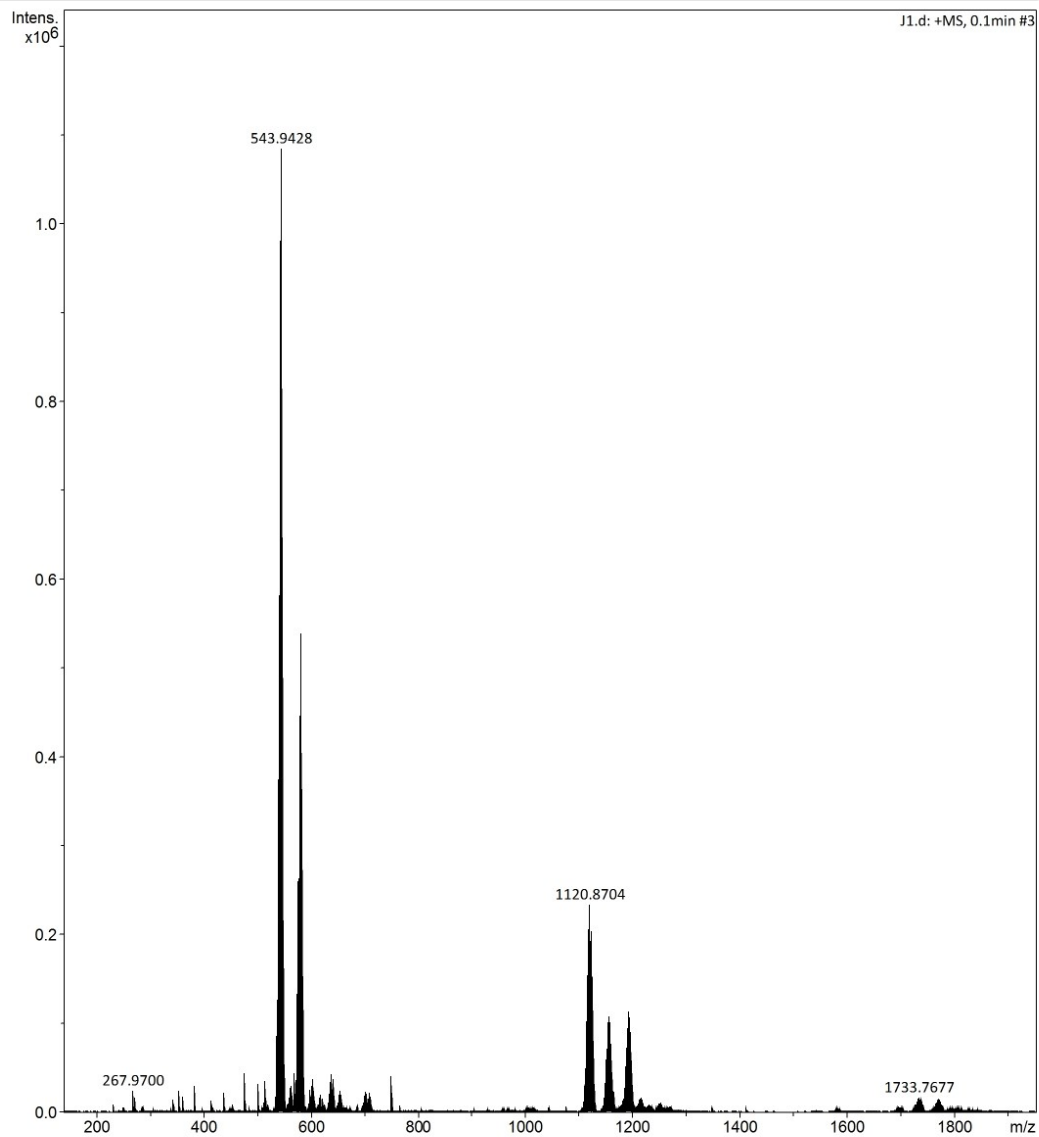

**Fig. S11.** High resolution mass spectrum (HRMS) of complex **1**.

## Generic Display Report

### Analysis Info

Analysis Name D:\Data\User Data\External Samples\Shwetha2\J2.d  
Method Tune\_pos\_Mid.m  
Sample Name MEOH  
Comment

Acquisition Date 2/5/2021 1:59:33 PM

Operator HRMS  
Instrument maXis impact

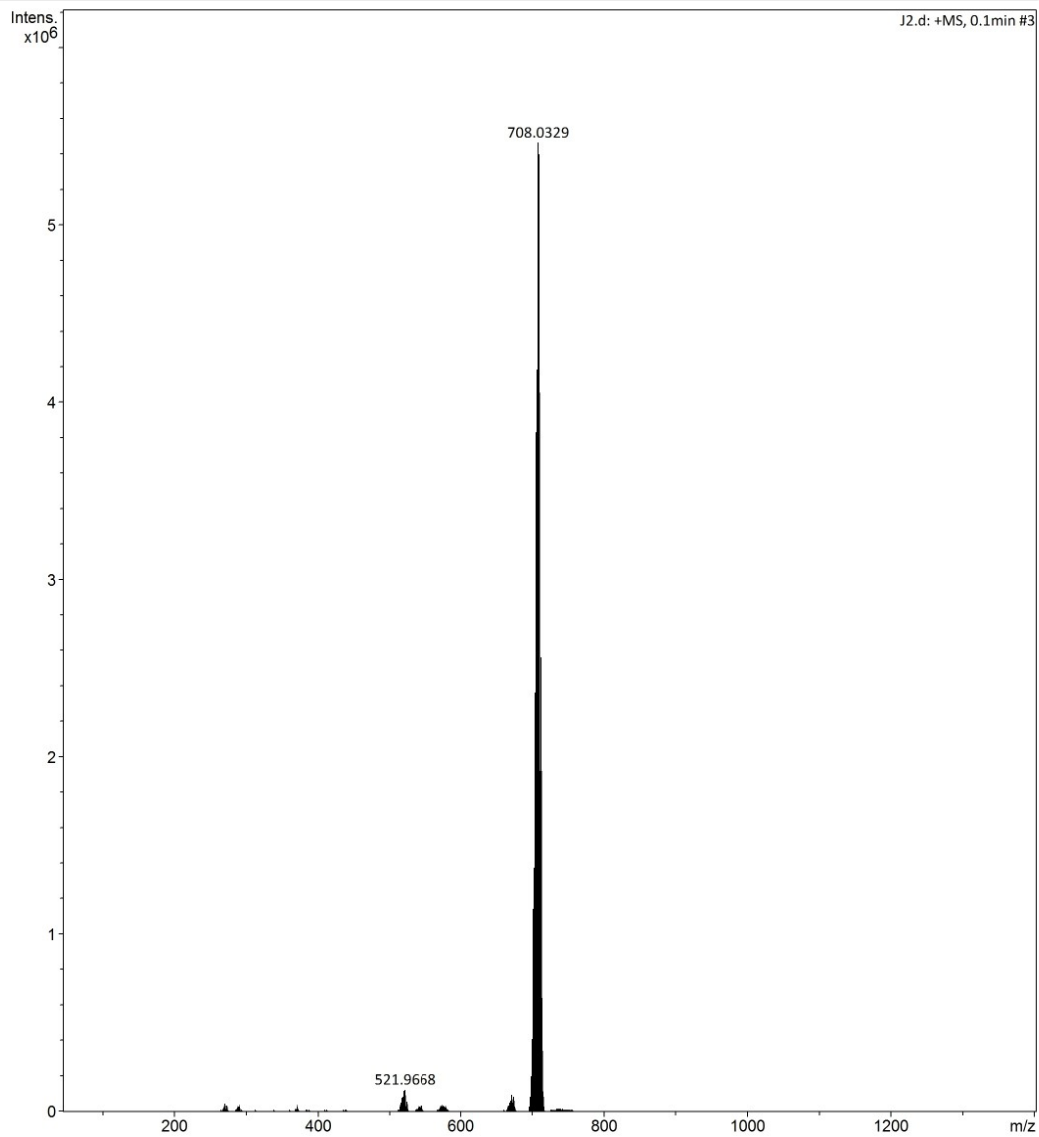

**Fig. S12.** High resolution mass spectrum (HRMS) of complex **2**.

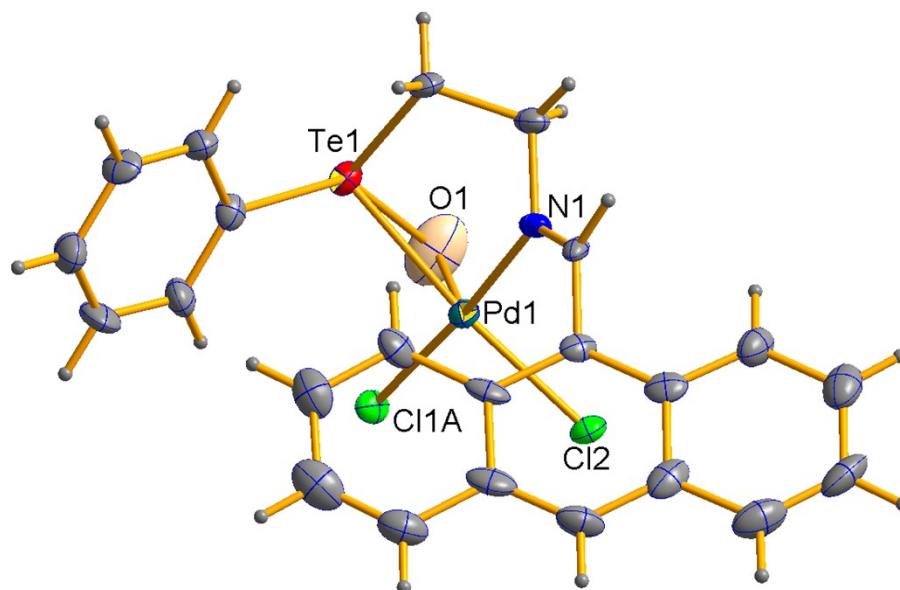

**Fig. S13.** Molecular structure of complex **1** with crystallized water molecule

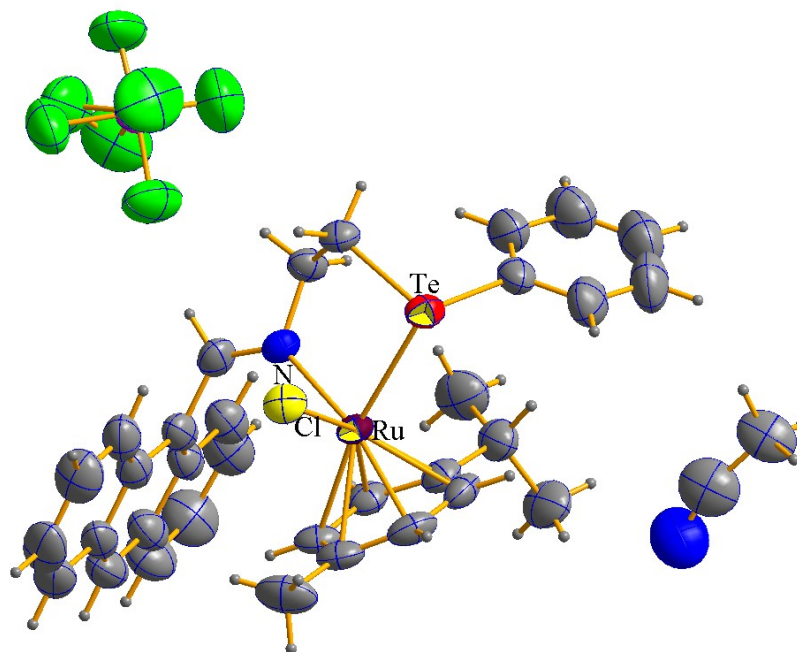

**Fig. S14.** Molecular structure of complex **2** with PF<sub>6</sub> anion and acetonitrile molecule

**S1. NMR data of cross-coupled products obtained in C-O coupling reactions of aryl halides and phenol or derivatives of phenol**

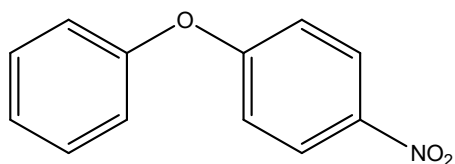

**1-Nitro-4-phenoxy benzene:** Yellow solid.  $^1\text{H}$  NMR (500 MHz,  $\text{CDCl}_3$ ,  $25^\circ\text{C}$  vs TMS),  $\delta(\text{ppm})$ : 8.11-8.14 (d, 2H), 7.34-7.40 (t, 2H), 7.16-7.21 (t, 1H), 7.01-7.03 (d, 2H), 6.92-6.95 (d, 2H).+

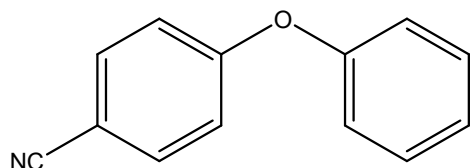

**4-Phenoxybenzotrile:** Colourless solid.  $^1\text{H}$  NMR (500 MHz,  $\text{CDCl}_3$ ),  $\delta(\text{ppm})$ : 7.55 (d, 2H), 7.43 (t, 2H), 7.20 (t, 1H), 7.00 (d, 2H), 6.95 (d, 2H).

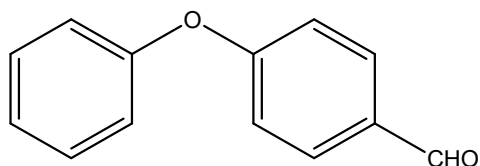

**4-Phenoxybenzaldehyde:** Yellow liquid.  $^1\text{H}$  NMR (500 MHz,  $\text{CDCl}_3$ ,  $25^\circ\text{C}$  vs TMS),  $\delta(\text{ppm})$ : 9.92 (s, 1H), 7.84-7.86 (d, 2H), 7.40-7.45 (t, 2H), 7.20-7.26 (m, 1H), 7.05-7.11 (t, 4h).

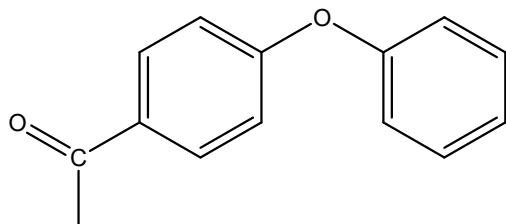

**1-(4-phenoxyphenyl)ethanone:** Colourless solid.  $^1\text{H}$  NMR (500 MHz,  $\text{CDCl}_3$ ),  $\delta(\text{ppm})$ : 7.93 (m, 2H), 7.37-7.41 (m, 2H), 7.18-7.21 (t, 1H), 7.08-7.06 (m, 2H), 6.98-7.00 (m, 2H), 2.57 (s, 3H).

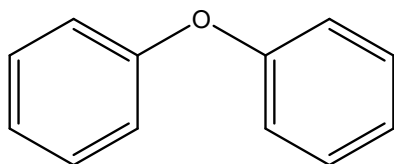

**Diphenyl ether:** Colorless liquid.  $^1\text{H}$  NMR (500 MHz,  $\text{CDCl}_3$ ),  $\delta(\text{ppm})$ : 7.25 (t, 4H), 6.93 (t, 2H), 7.37 (d, 4H).

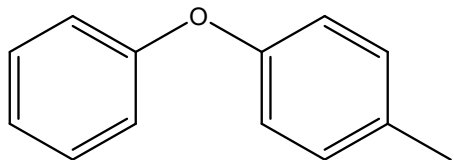

**1-Methyl-4-phenoxybenzene:** Colorless solid.  $^1\text{H}$  NMR (500 MHz,  $\text{CDCl}_3$ ,  $25^\circ\text{C}$  vs TMS),  $\delta(\text{ppm})$ : 7.46-7.48 (m, 2H), 7.23-7.26 (t, 2H), 7.06-7.07 (m, 1H), 6.98-7.04 (m, 2H), 6.89-6.91 (m, 2H), 2.26 (s, 3H).

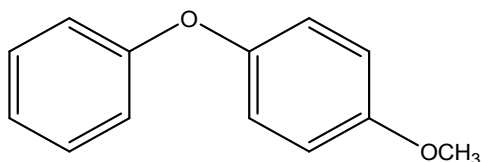

**1-Methoxy-4-phenoxybenzene:** Colorless liquid.  $^1\text{H}$  NMR (500 MHz,  $\text{CDCl}_3$ ,  $25^\circ\text{C}$  vs TMS),  $\delta(\text{ppm})$ : 7.25-7.32 (m, 2H), 7.01-7.06 (t, 1H), 6.93-7.01 (m, 4H), 6.86-6.90 (m, 2H), 3.81 (s, 3H).

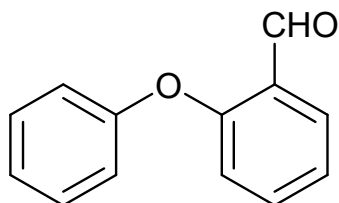

**2-Phenoxybenzaldehyde:** Yellow liquid.  $^1\text{H}$  NMR (500 MHz,  $\text{CDCl}_3$ ,  $25^\circ\text{C}$  vs TMS),  $\delta(\text{ppm})$ : 10.45 (s, 1H), 7.85-7.88 (d, 1H), 7.41-7.47 (t, 1H), 7.30-7.35 (t, 2H), 7.10-7.14 (t, 2H), 6.98-7.01 (d, 2H), 6.81-6.84 (d, 1H).

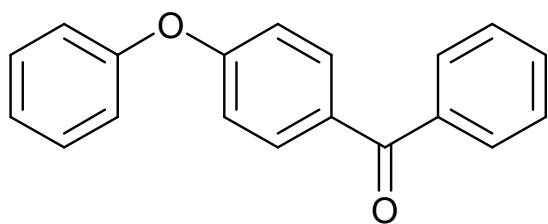

**4-phenoxybenzophenone:** Yellow liquid.  $^1\text{H}$  NMR (500 MHz,  $\text{CDCl}_3$ ,  $25^\circ\text{C}$  vs TMS),  $\delta(\text{ppm})$ : 7.81-7.80 (d, 2H), 7.77-7.75 (d, 2H), 7.55-7.528 (t, 1H), 7.46-7.43 (t, 2H), 7.39-7.36 (t, 2H), 7.19-7.16 (t, 1H), 7.09-7.05 (m, 3H)

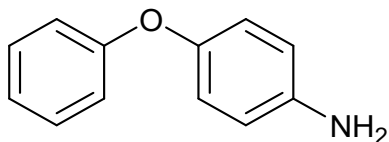

**4-phenoxyaniline:** Yellow liquid.  $^1\text{H}$  NMR (500 MHz,  $\text{CDCl}_3$ ,  $25^\circ\text{C}$  vs TMS),  $\delta(\text{ppm})$ : 7.26-7.29 (t, 2H), 7.01-6.92 (m, 3H), 6.87-6.75 (d, 2H), 6.67-6.51 (d, 2H).



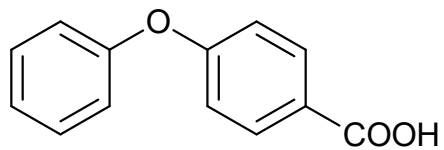

**4-phenoxybenzoic acid:** Yellow liquid.  $^1\text{H NMR}$  (500 MHz,  $\text{CDCl}_3$ ,  $25^\circ\text{C}$  vs TMS),  $\delta(\text{ppm})$ : 8.10-8.08 (d, 2H), 7.41-7.36 (t, 2H), 7.21-7.17 (t, 1H), 7.09-7.03 (m, 4H).

**S2. NMR spectra of cross-coupled products obtained in C-O coupling reactions of aryl halides and phenol or derivatives of phenol**

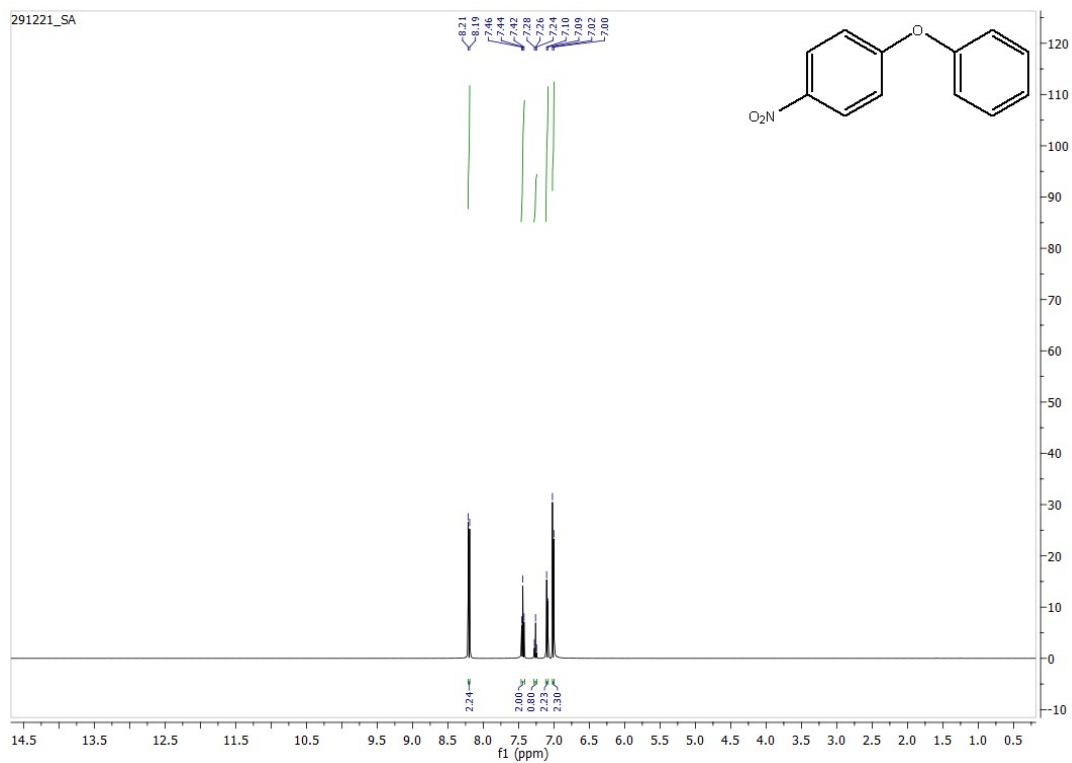

**Fig. S15.**  $^1\text{H}$  NMR of 1-nitro-4-phenoxy benzene recorded in  $\text{CDCl}_3$

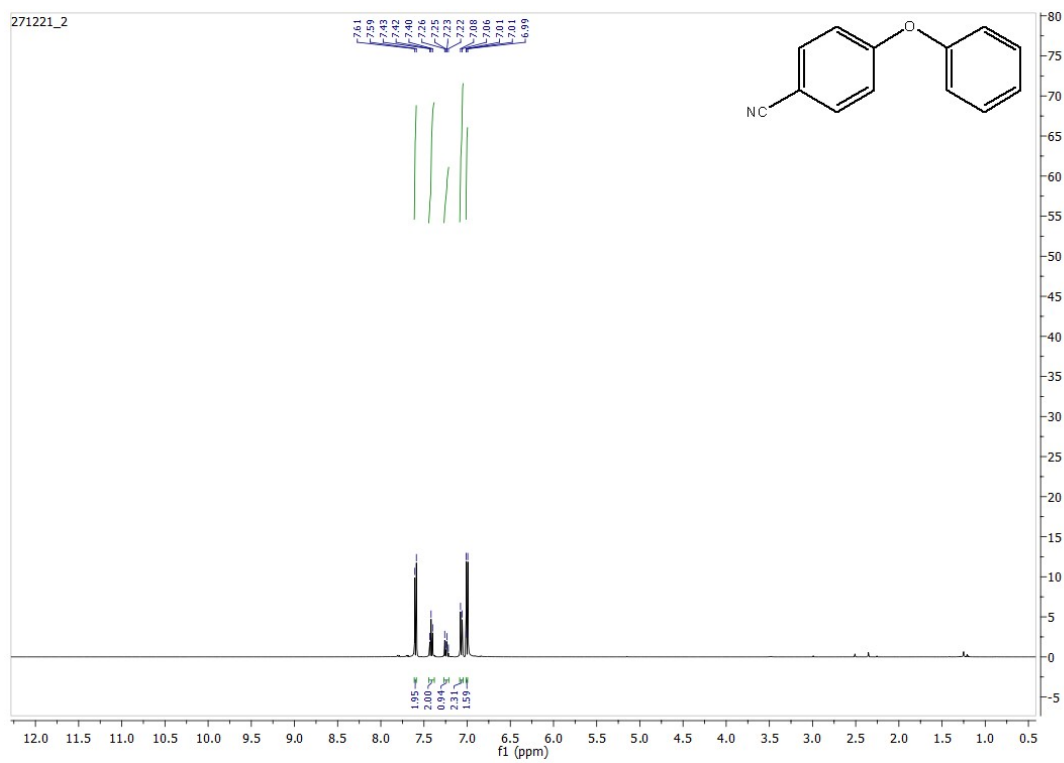

**Fig. S16.**  $^1\text{H}$  NMR of 4-phenoxybenzotrile recorded in  $\text{CDCl}_3$

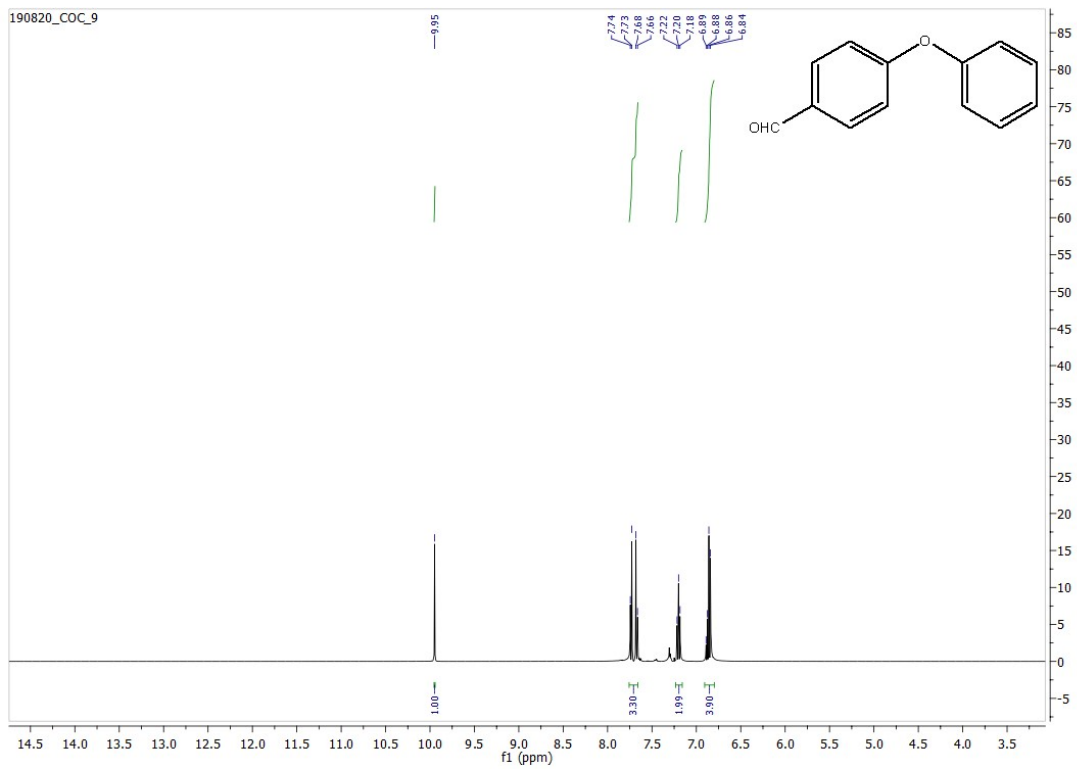

**Fig. S17.**  $^1\text{H}$  NMR of 4-phenoxy benzaldehyde recorded in  $\text{CDCl}_3$

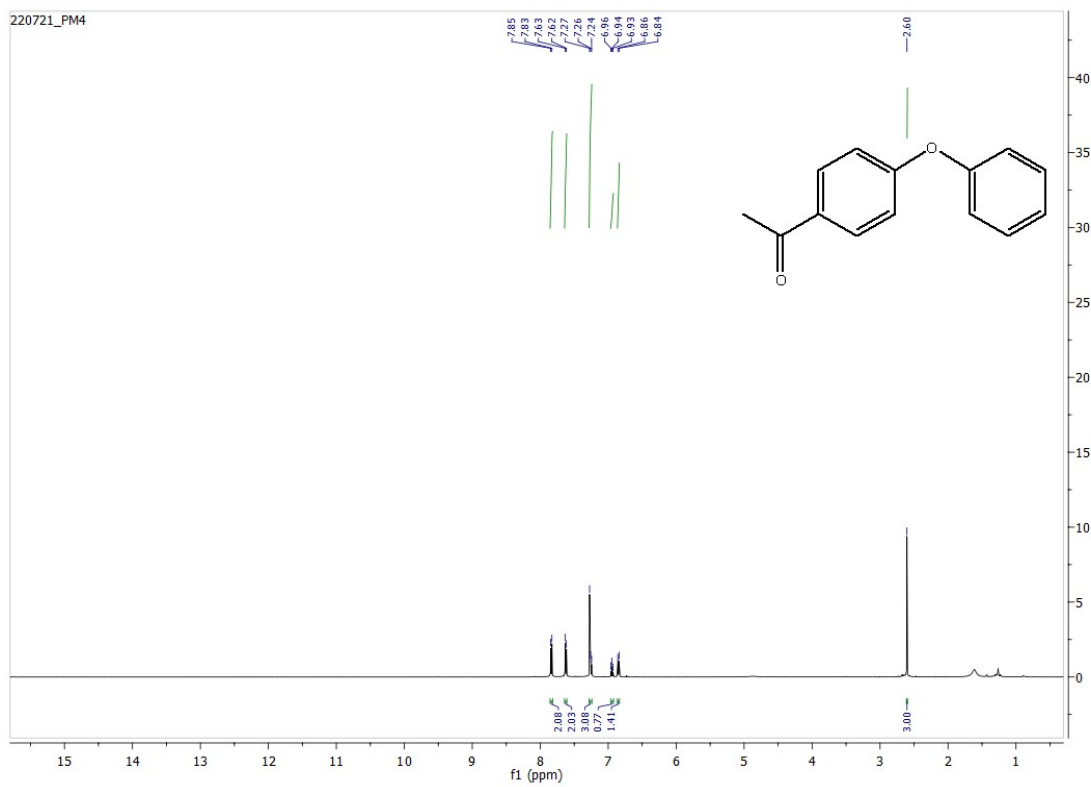

**Fig. S18.**  $^1\text{H}$  NMR of 4-acetyl diphenylether recorded in  $\text{CDCl}_3$

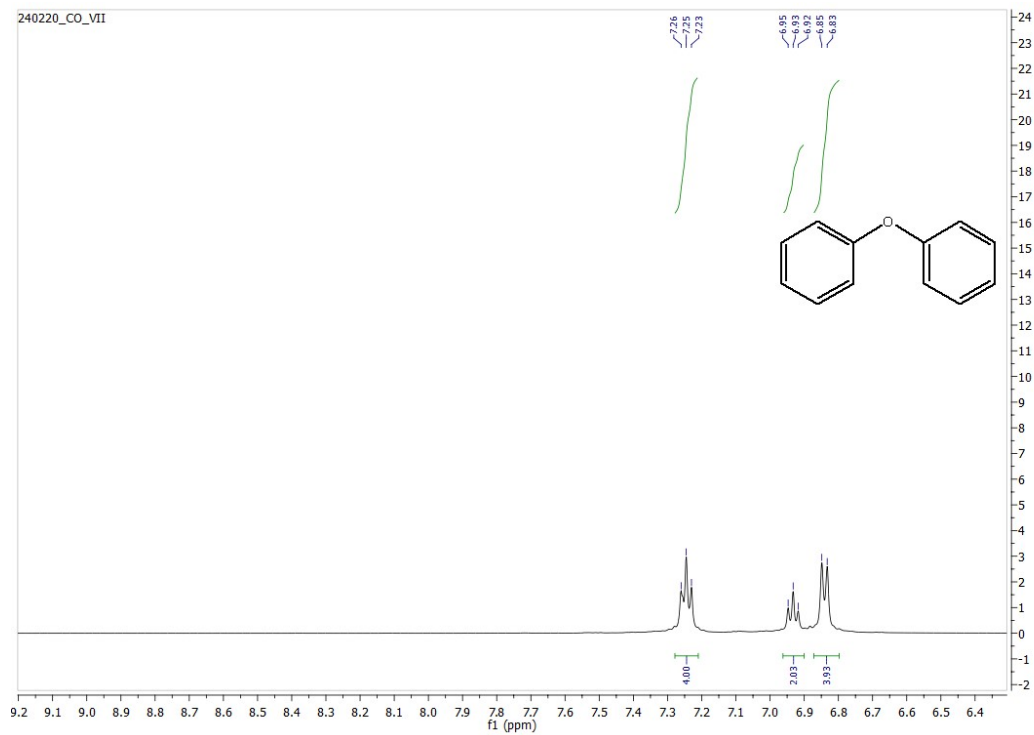

**Fig. S19.**  $^1\text{H}$  NMR of diphenyl ether recorded in  $\text{CDCl}_3$

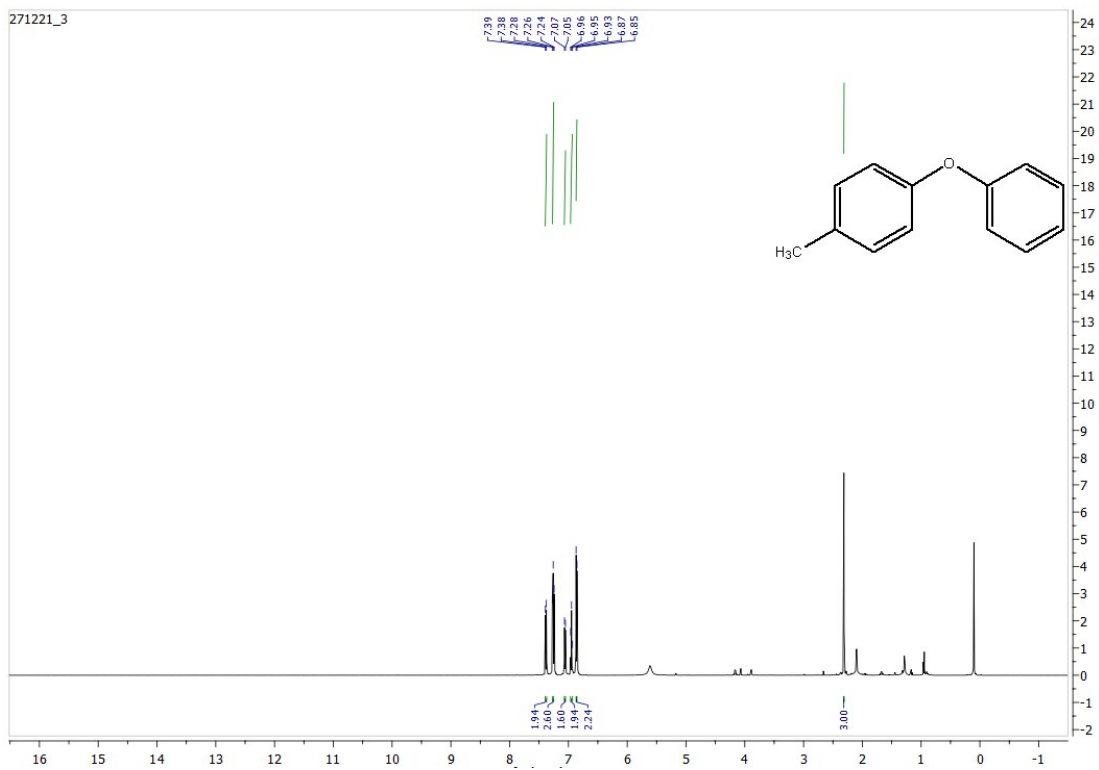

**Fig. S20.**  $^1\text{H}$  NMR of 4-methyl diphenylether recorded in  $\text{CDCl}_3$

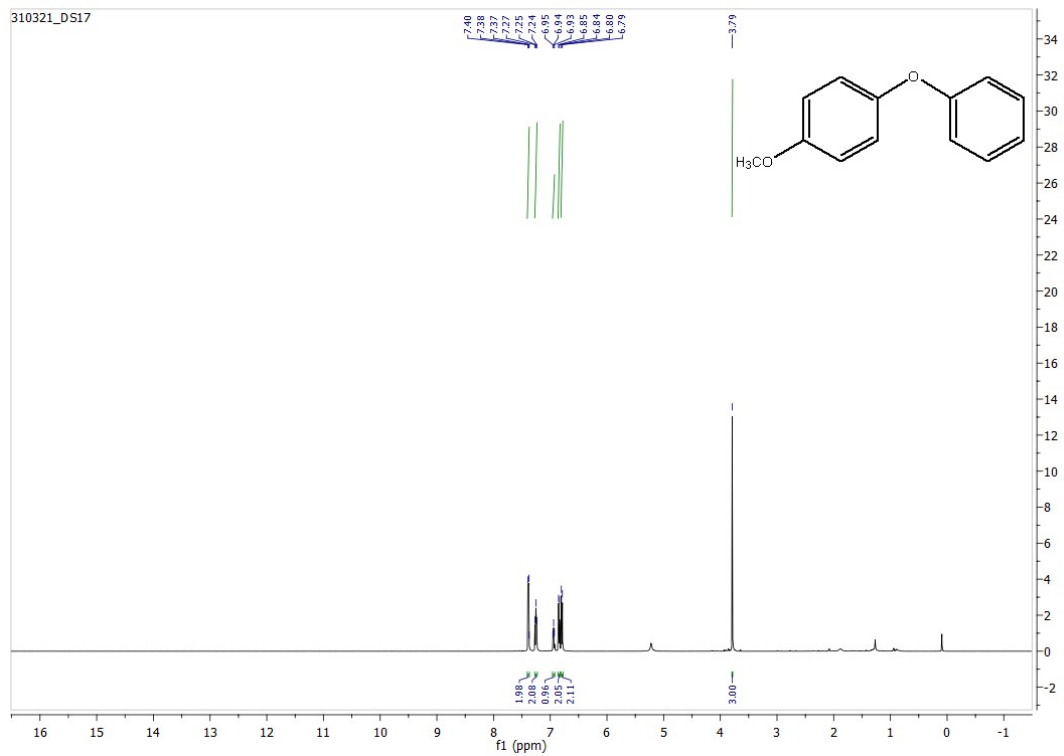

**Fig. S21.**  $^1\text{H}$  NMR of 4-methoxy diphenylether recorded in  $\text{CDCl}_3$



**S3. NMR data of products obtained in Aldehyde to amide reactions of aryl aldehyde and hydroxylamine hydrochloride.**

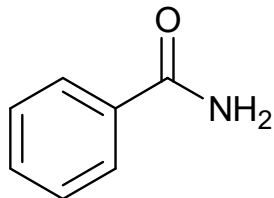

**Benzamide:**  $^1\text{H}$  NMR (500 MHz,  $\text{CDCl}_3$ )  $\delta$ (ppm): 7.816 (d, 2H,  $J = 7.6$  Hz), 7.528 (t, 1H,  $J = 7.4$  Hz), 7.4439 (t, 2H,  $J = 7.6$  Hz), 6.2237 (br s, 2H).

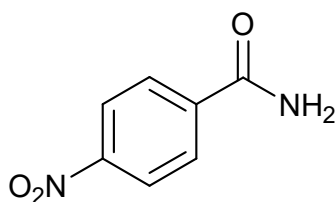

**4-Nitrobenzamide:**  $^1\text{H}$  NMR (500 MHz,  $\text{CDCl}_3$ )  $\delta$ (ppm): 8.15 (d,  $J = 9.2$  Hz, 2H), 7.96 (d,  $J = 8.8$  Hz, 2H), 7.45 (br s, 1H), 6.31 (br s, 1H).

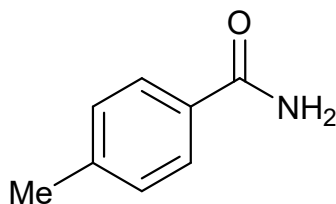

**4-Methylbenzamide:**  $^1\text{H}$  NMR (500 MHz,  $\text{CDCl}_3$ )  $\delta$ (ppm): 7.71 (d,  $J = 8.0$  Hz, 2H), 7.25 (d,  $J = 8.0$  Hz, 2H), 6.06 (br s, 1H), 5.78 (br s, 1H), 2.41 (s, 3H).

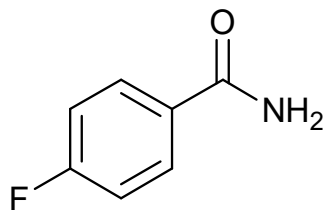

**4-Fluorobenzamide:**  $^1\text{H}$  NMR (500 MHz,  $\text{CDCl}_3$ )  $\delta$ (ppm): 7.845-7.816 (m, 2H), 7.129 (t, 2H), 6.052-5.830 (br s, 2H).

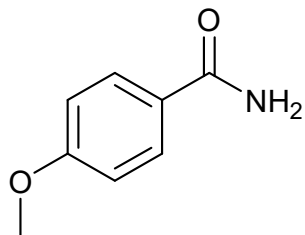

**4-Methoxybenzamide:**  $^1\text{H}$  NMR (500 MHz,  $\text{CDCl}_3$ )  $\delta$ (ppm): 7.782 (d, 2H,  $J = 8.7$  Hz), 6.935 (d, 2H,  $J = 8.8$  Hz), 6.004-5.709 (br s, 2H), 3.857 (s, 3H).

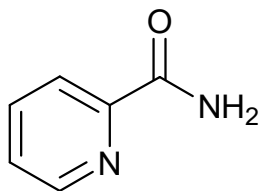

**Picolinamide:**  $^1\text{H}$  NMR (500 MHz,  $\text{CDCl}_3$ )  $\delta$ (ppm): 8.56 (d,  $J = 2.0$  Hz, 1H), 8.18 (d,  $J = 7.6$  Hz, 1H), 7.84 (t,  $J = 7.6, 1.6$  Hz, 2H), 7.45-7.42 (m, 1H), 5.73 (br s, 1H)

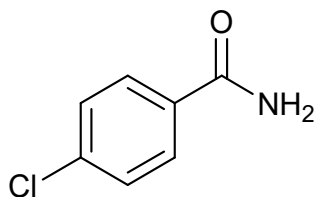

**4-Chlorobenzamide:**  $^1\text{H}$  NMR (500 MHz,  $\text{CDCl}_3$ )  $\delta$ (ppm): 7.755 (d, 2H,  $J = 8.4$  Hz), 7.432 (d, 2H,  $J = 7.7$  Hz), 6.040 (br s, 1H), 5.721 (br s, 1H).

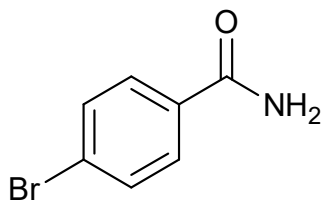

**4-Bromobenzamide:**  $^1\text{H}$  NMR (500 MHz,  $\text{CDCl}_3$ )  $\delta$ (ppm): 7.648 (d, 2H,  $J = 8.4$  Hz), 7.596 (d, 2H,  $J = 8.4$  Hz), 6.041 (br s, 1H), 5.697 (br s, 1H).

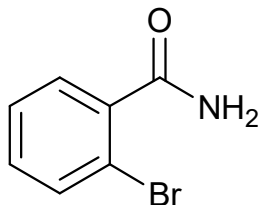

**2-Bromobenzamide:**  $^1\text{H}$  NMR (500 MHz,  $\text{CDCl}_3$ )  $\delta$ (ppm): 7.65 (d,  $J = 8.0, 1.2$  Hz, 1H), 7.58-7.46 (m, 3H), 6.35 (br s, 1H), 6.19 (br s, 1H)

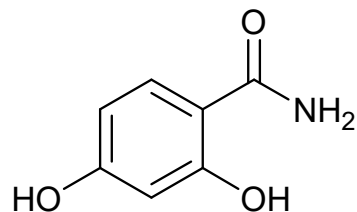

**2,4-dihydroxybenzamide:**  $^1\text{H}$  NMR (500 MHz,  $\text{CDCl}_3$ )  $\delta$ (ppm): 13.26 (s, 1H), 10.04 (s, 1H), 8.08 (br s, 1H), 7.67 (d,  $J = 7.5$ , 1H), 7.55 (br s, 1H), 6.26-6.21 (m, 2H)

**S4. NMR spectra of products obtained in Aldehyde to amide reactions of aryl aldehyde and hydroxylamine hydrochloride.**

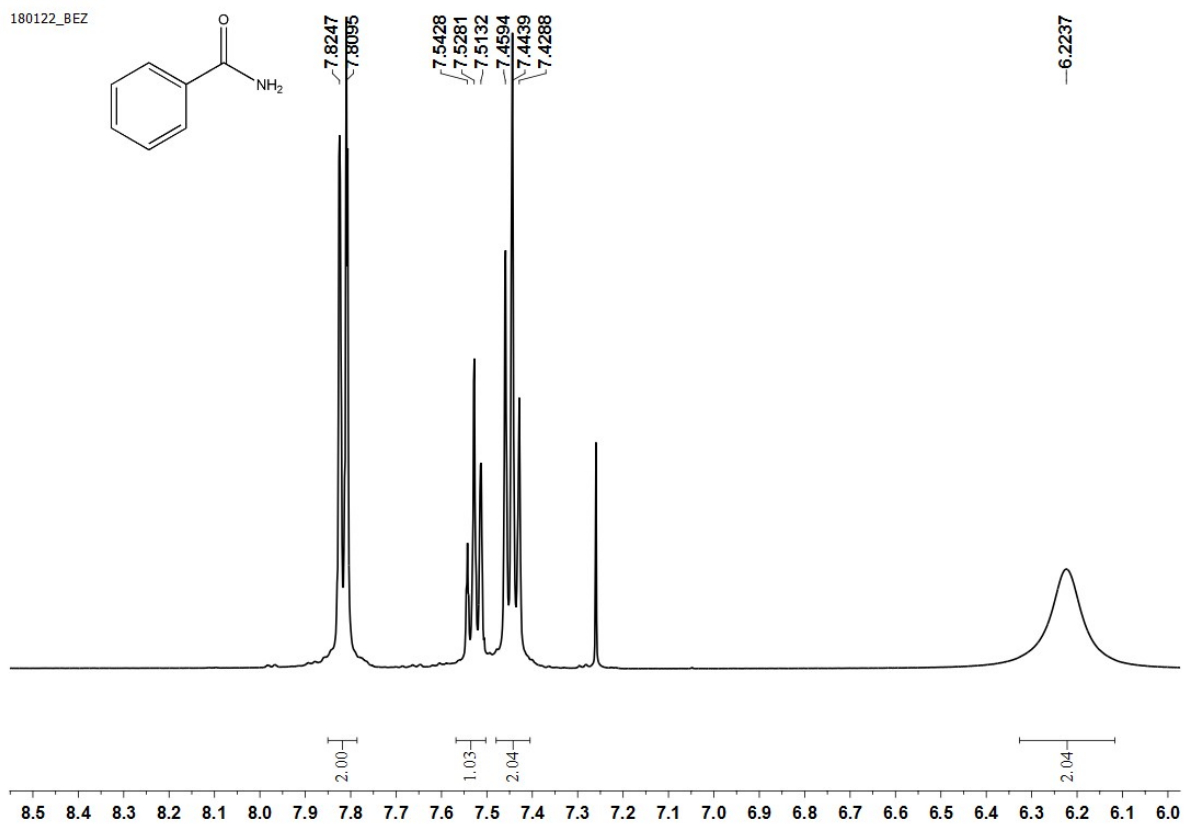

**Fig. S22.**  $^1\text{H}$  NMR of Benzamide recorded in  $\text{CDCl}_3$

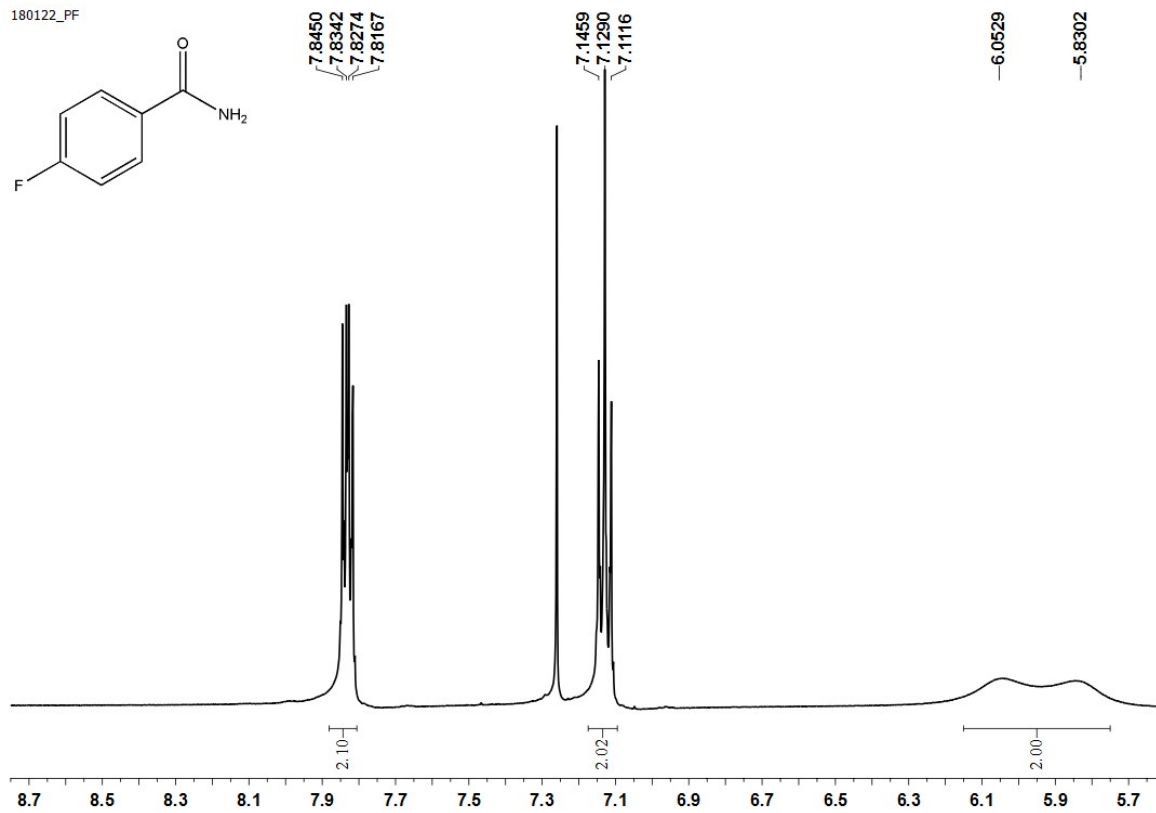

**Fig. S23.**  $^1\text{H}$  NMR of 4-Fluorobenzamide recorded in  $\text{CDCl}_3$

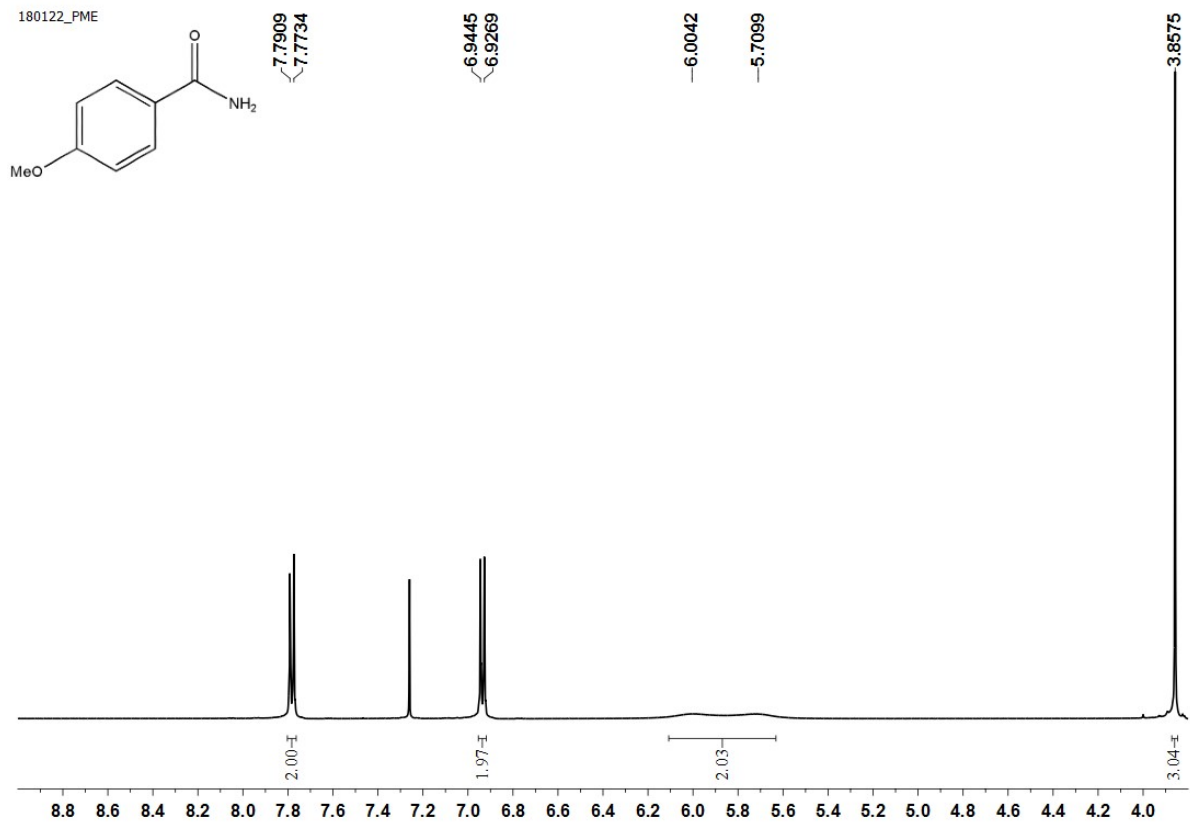

**Fig. S24.** <sup>1</sup>H NMR of 4-methoxybenzamide recorded in CDCl<sub>3</sub>

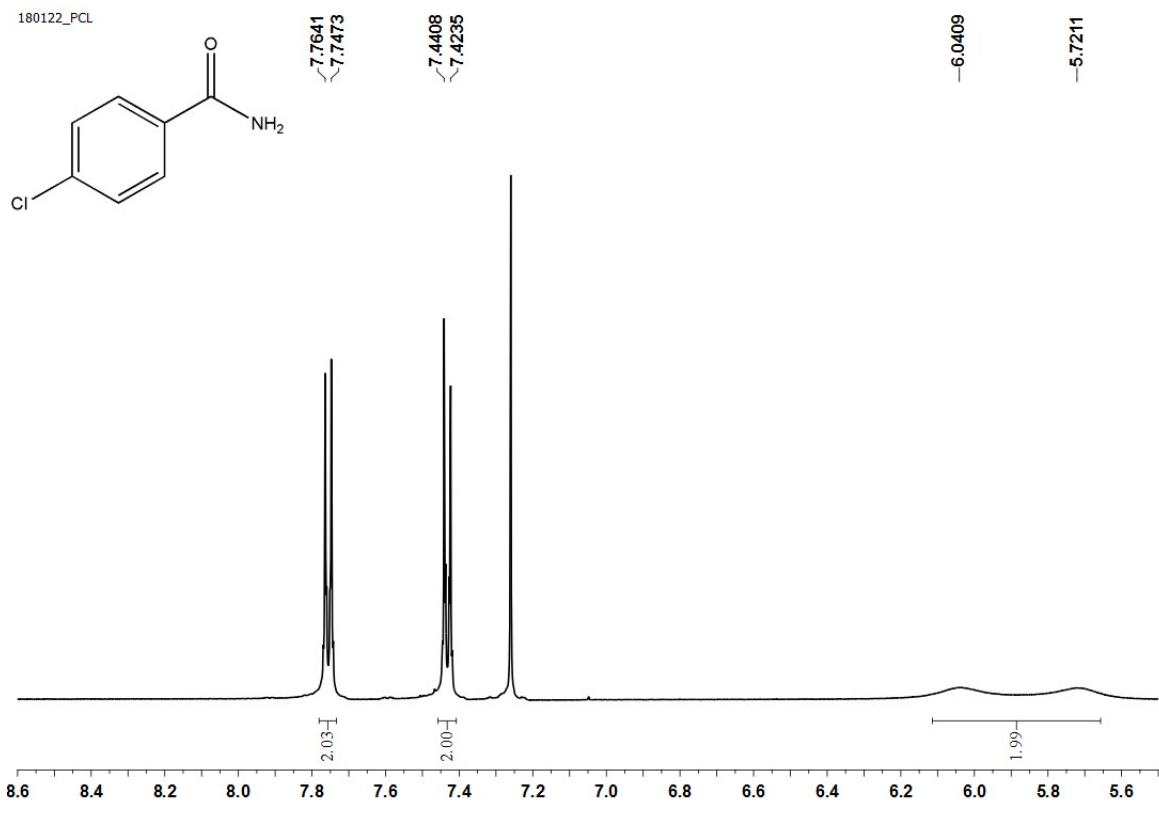

**Fig. S25.**  $^1\text{H}$  NMR of 4-chlorobenzamide recorded in  $\text{CDCl}_3$

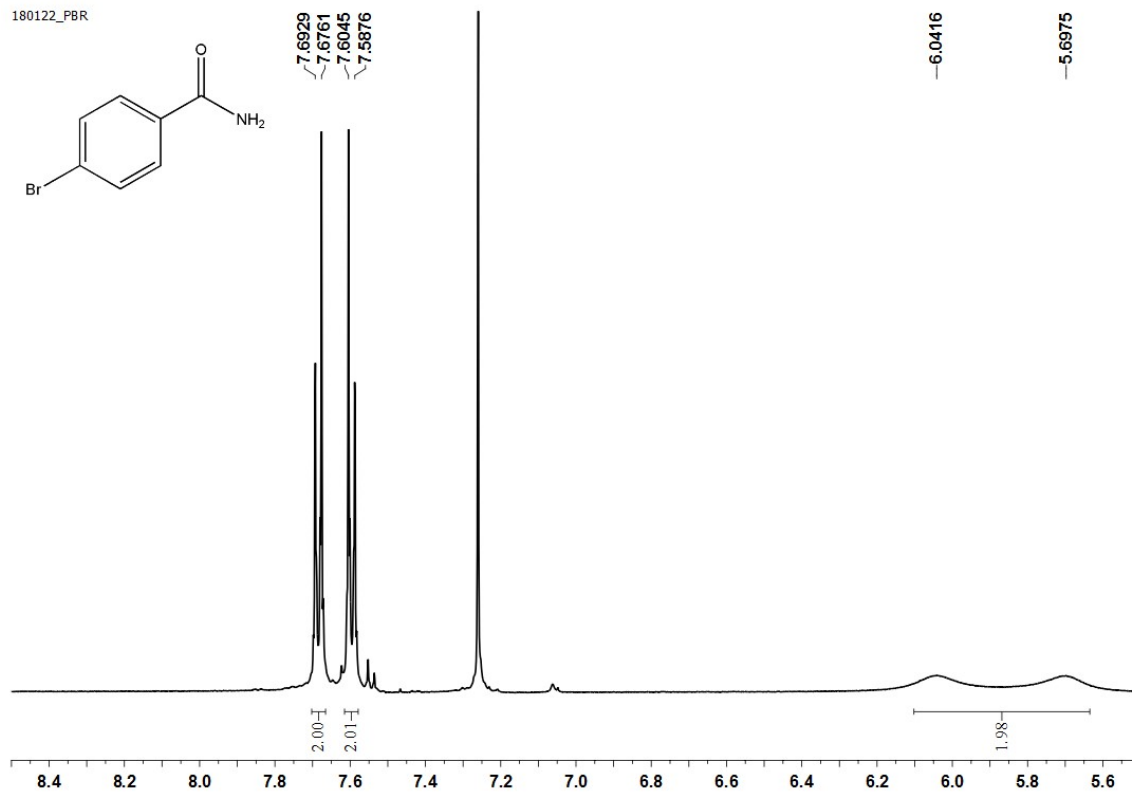

**Fig. S26.**  $^1\text{H}$  NMR of 4-bromobenzamide recorded in  $\text{CDCl}_3$
